# Supplementary material
Source: publisher site journal article supplement (https://www.dovepress.com/article/237576)

**Figure S1 The effect of lncRNA NNT-AS1 knockdown on ATG7 expression was detected in A549/DDP (A) and H522/DDP (B) cells.** **P*<0.05.

**
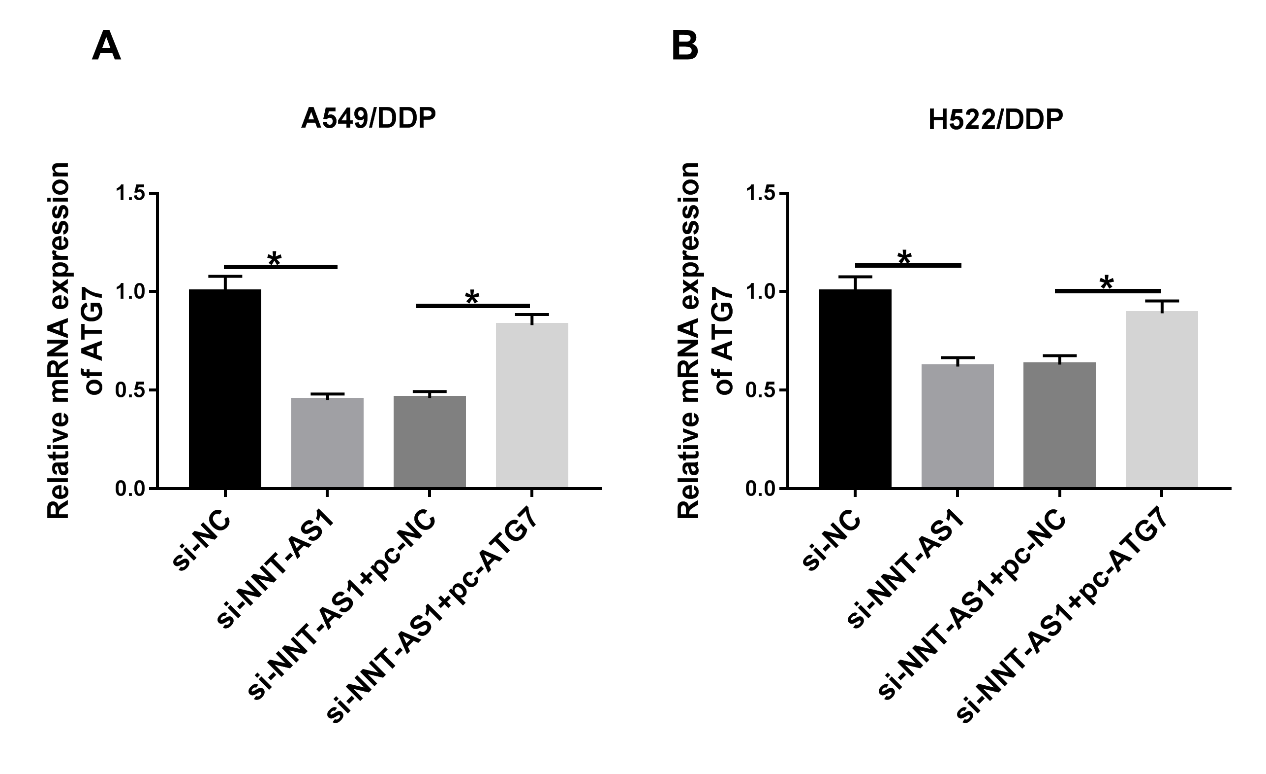
**

**Figure S2 NNT-AS1 silencing enhanced DDP sensitivity of lung cancer cell *in vivo.*** A549/DDPcells introduced with sh-NC or sh-NNT-AS1 were inoculated subcutaneously into the nude mice. The mice were given PBS or 3 mg/kg DDP by subcutaneous injection on day 7 after inoculation. (A and B) Tumor volume and tumor weight were measured in xenografts. (C) NNT-AS1 level was detected by RT-qPCR assay in xenografts. **P*<0.05.


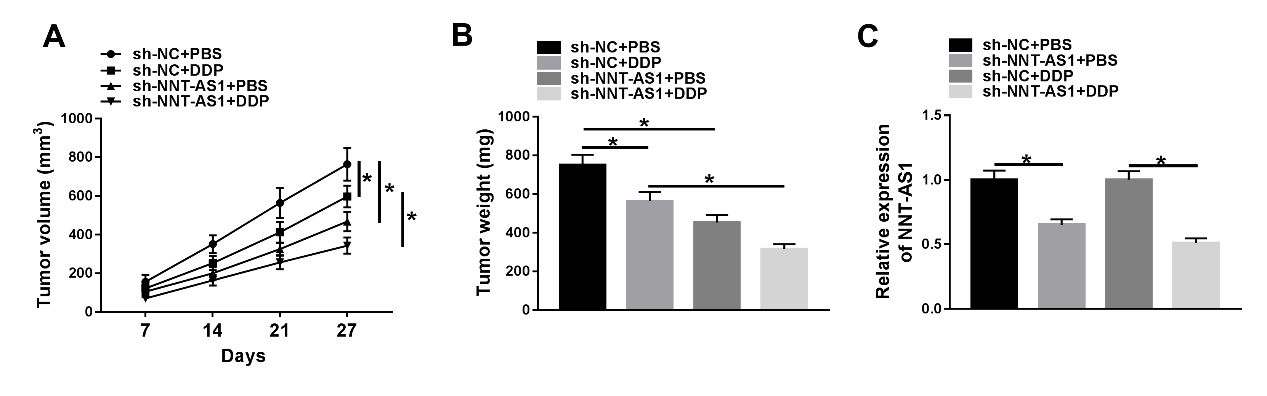

Supplement: Supplementary file 1 [file get_supplementary_file.php]
